# Supplementary material for: UV-enhanced atomic layer deposition of Al2O3 thin films at low temperature for gas-diffusion barriers
Source: Royal Society of Chemistry journal article supplement (doi:10.1039/c6ra27759d), 2017-01-01
Supplement: c6ra27759d1.pdf [file c6ra27759d1.pdf]

## Supplementary Information

### **UV-enhanced atomic layer deposition of Al<sub>2</sub>O<sub>3</sub> thin films at low temperature for gas-diffusion barrier**

Kwan Hyuck Yoon,<sup>‡</sup> Hongbum Kim,<sup>‡</sup> Yong-Eun Koo Lee, Nabeen K. Shrestha and Myung Mo Sung\*

Department of Chemistry, Hanyang University, Seoul, 04763, Republic of Korea.

\* Corresponding authors.

E-mail address: [smm@hanyang.ac.kr](mailto:smm@hanyang.ac.kr)

<sup>‡</sup> These authors contributed equally to this work.

**Table S1.** WVTRs of various Al<sub>2</sub>O<sub>3</sub> barrier thin films with TFE performance

| Process | Deposition condition                 | Substrate    | Film thickness [nm] | WVTR measurement                                        | WVTR [g m <sup>-2</sup> day <sup>-1</sup> ] | Ref.      |
|---------|--------------------------------------|--------------|---------------------|---------------------------------------------------------|---------------------------------------------|-----------|
| UV-ALD  | TMA, H <sub>2</sub> O at 40 °C       | Glass        | 100                 | Electrical Ca test (at 70 °C, 90% RH and 85 °C, 85% RH) | 9.20×10 <sup>-7</sup> (24 °C)               | This work |
|         |                                      | PET          | 20-100              | MOCON test (at 37.8 °C, 100% RH)                        | < 1.00×10 <sup>-3</sup> (37.8 °C)           |           |
| ALD     | TMA, H <sub>2</sub> O at 100-175 °C  | PEN, Kapton® | 26                  | Tritiated water (HTO) test (at RT, 100% RH)             | 1.00×10 <sup>-3</sup> (24 °C)               | [1]       |
| ALD     | TMA, H <sub>2</sub> O at 120 °C      | PEN          | 25                  | Optical Ca test (at 38 or 60 °C, 85% RH)                | < 1.00×10 <sup>-5</sup> (23 °C)             | [2]       |
| ALD     | TMA, H <sub>2</sub> O at 80 °C       | Glass        | 60                  | Electrical Ca test (at 20 °C, 60% RH)                   | 4.90×10 <sup>-4</sup> (20 °C)               | [3]       |
|         | TMA, O <sub>3</sub> at 80 °C         |              |                     |                                                         | 8.70×10 <sup>-6</sup> (20 °C)               |           |
| PE-ALD  | TMA, O <sub>2</sub> plasma at RT     | PEN          | 20                  | Optical Ca test (at 21 °C, 60% RH)                      | 5.00×10 <sup>-3</sup> (25 °C)               | [4]       |
| PE-ALD  | TMA, O <sub>2</sub> plasma at 120 °C | PES          | 11.8                | MOCON test (at 37.8 °C, 100% RH)                        | < 4.00×10 <sup>-3</sup> (37.8 °C)           | [5]       |
| PE-ALD  | TMA, O <sub>2</sub> plasma at 120 °C | PEN          | 50                  | MOCON test (at 38 °C, 100% RH)                          | 8.85×10 <sup>-4</sup> (20 °C)               | [6]       |
| RP-ALD  | TMA, O <sub>2</sub> plasma at 100 °C | PES          | 100                 | Electrical Ca test (at 50 °C, 50% RH)                   | 2.60×10 <sup>-4</sup> (50 °C)               | [7]       |

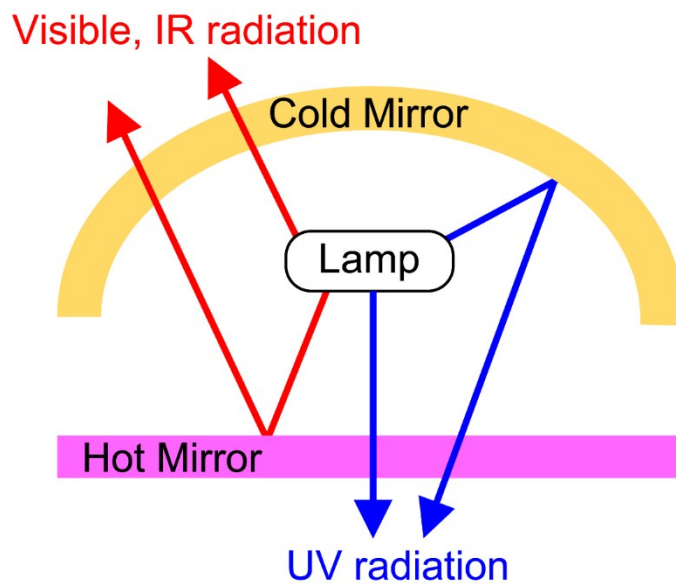

**Fig. S1.** Schematic diagram showing the arrangement of hot and cold mirrors in UV-ALD process to filter out IR and visible lights from the UV source.

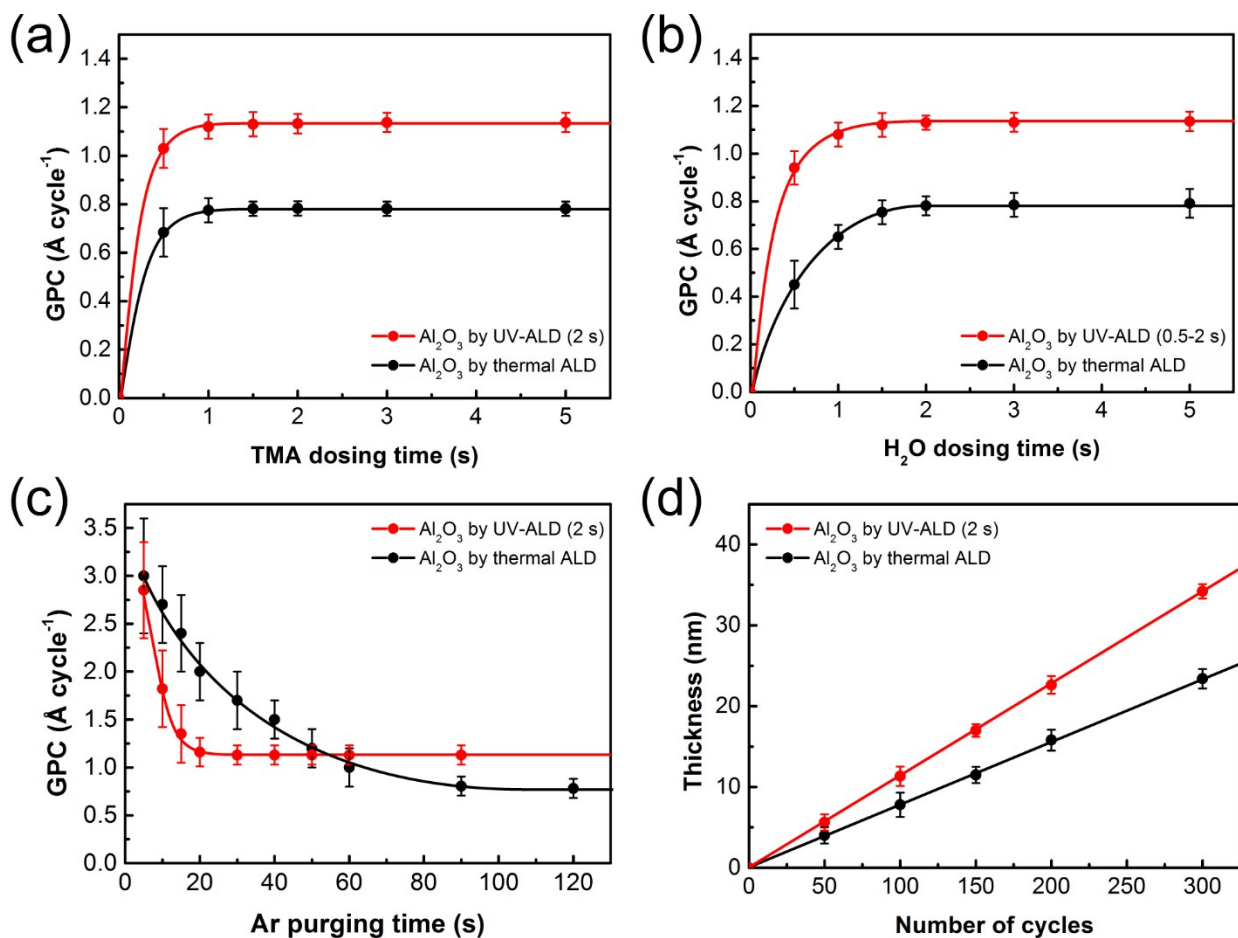

**Fig. S2.** Influence of various ALD parameters on the growth of  $\text{Al}_2\text{O}_3$  film under thermal ALD and UV-ALD processes at  $40\text{ }^\circ\text{C}$ . Growth per cycle (GPC) of  $\text{Al}_2\text{O}_3$  film depending on (a) TMA dosing time, (b)  $\text{H}_2\text{O}$  dosing time, and (c) Ar gas purging time after  $\text{H}_2\text{O}$  dosing. For each GPC measurement in (a), (b) and (c), 500 cycles of ALD were performed. (d) Growth measured in terms of thickness of  $\text{Al}_2\text{O}_3$  film with respect to number of ALD cycles, showing the linear trend of film growth.

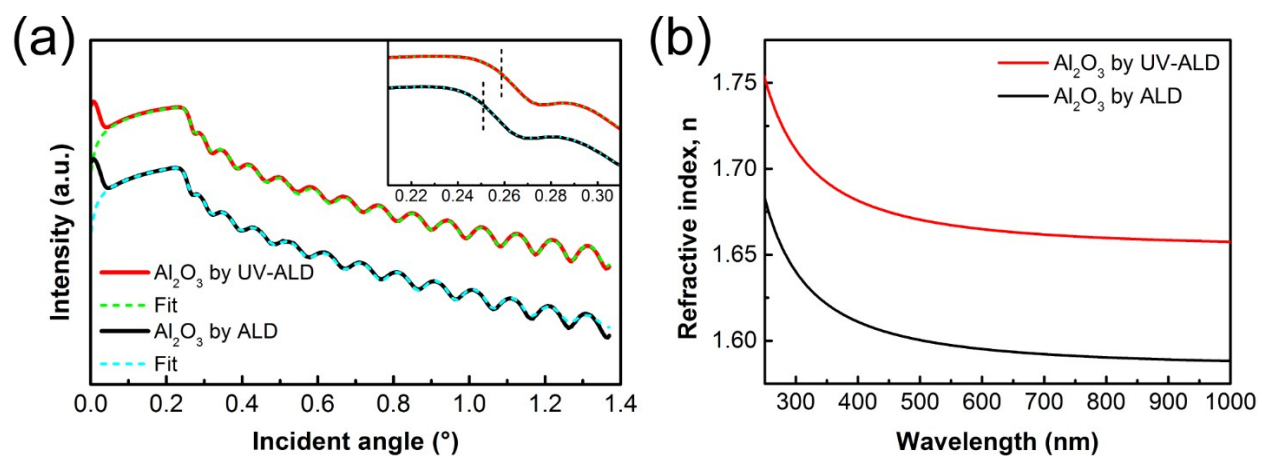

**Fig. S3.** (a) XRR spectra of  $\text{Al}_2\text{O}_3$  films grown under thermal ALD and UV-ALD processes at 40 °C. Solid lines are experimentally obtained spectra, while dotted lines represent the fitted spectra. Inset shows the critical angles of the XRR spectra for estimation of the film densities. (b) Ellipsometry spectra of the  $\text{Al}_2\text{O}_3$  thin films grown under thermal ALD and UV-ALD processes at 40 °C. Refractive indices of the films were obtained at 633 nm.

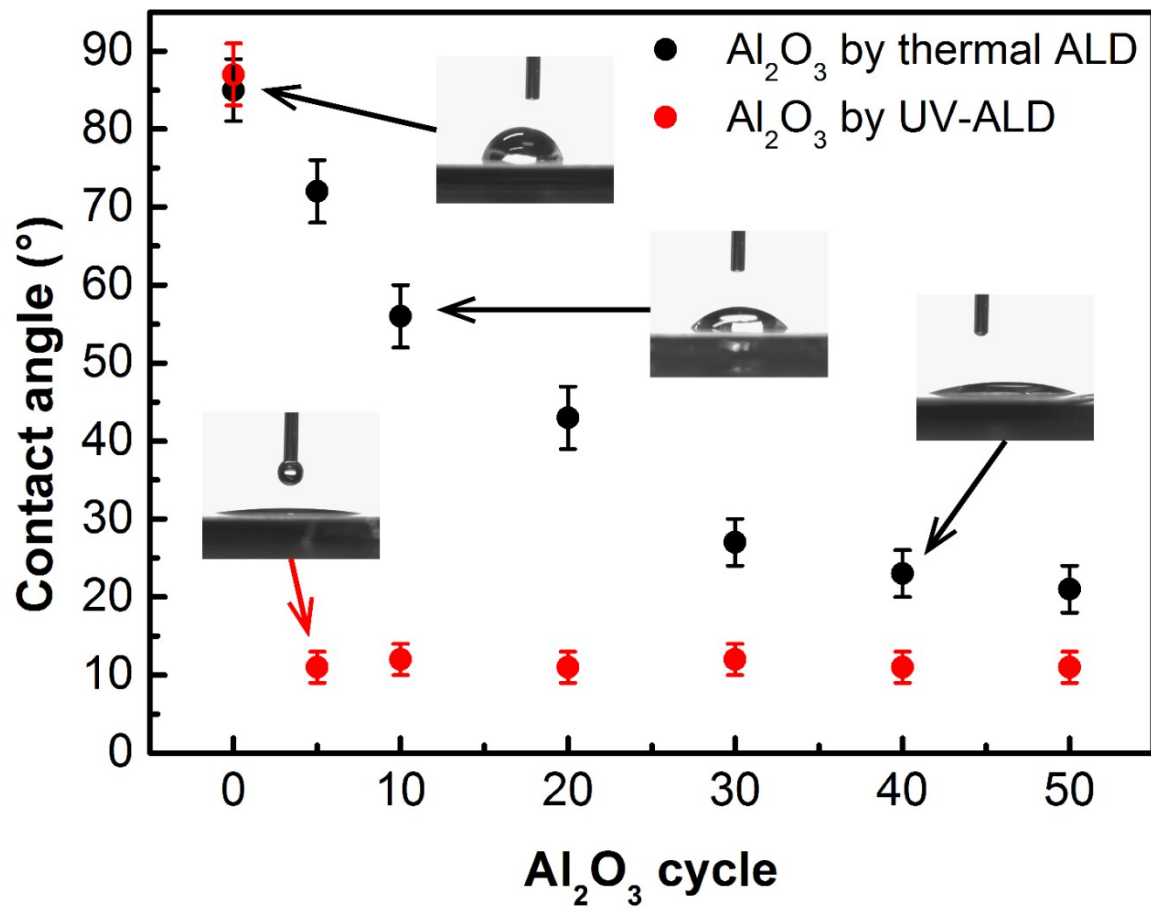

**Fig. S4.** Contact angle of water on the surface of Al<sub>2</sub>O<sub>3</sub> thin films deposited on PET substrates by thermal ALD and UV-ALD processes at 40 °C.

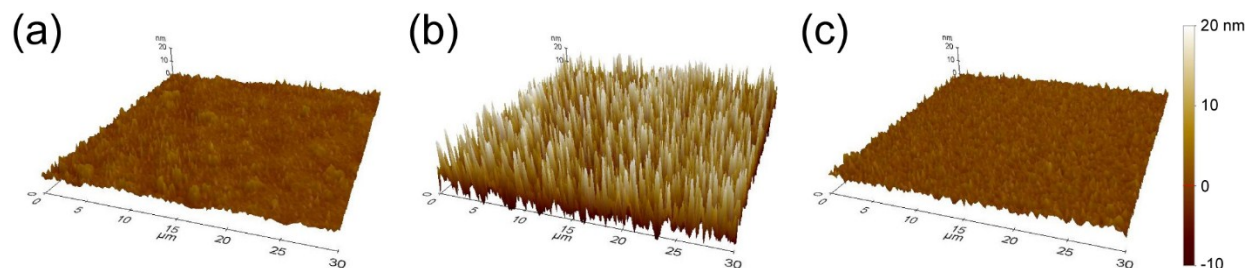

**Fig. S5.** AFM surface images. (a) Bare PET substrate.  $\text{Al}_2\text{O}_3$  thin films deposited on PET substrates for 100 cycles by (b) thermal ALD, and (c) UV-ALD at 40 °C. RMS surface roughness are 3.12, 6.38, and 3.34 nm, respectively, in the films shown in (a), (b), and (c).

## References

- 1 M. D. Groner, S. M. George, R. S. McLean and P. F. Carcia, *Appl. Phys. Lett.*, 2006, **88**, 051907.
- 2 P. F. Carcia, R. S. McLean, M. H. Reilly, M. D. Groner and S. M. George, *Appl. Phys. Lett.*, 2006, **89**, 031915.
- 3 Y. Q. Yang, Y. Duan, P. Chen, F. B. Sun, Y. H. Duan, X. Wang and D. Yang, *J. Phys. Chem. C*, 2013, **117**, 20308.
- 4 E. Langereis, M. Creatore, S. B. S. Heil, M. C. M. van de Sanden and W. M. M. Kessels, *Appl. Phys. Lett.*, 2006, **89**, 081915.
- 5 H. G. Kim and S. S. Kim, *Thin Solid Films*, 2011, **520**, 481.
- 6 J. G. Lee, H. G. Kim and S. S. Kim, *Thin Solid Films*, 2013, **534**, 515.
- 7 H. Jung, H. Choi, H. Jeon, S. Lee and H. Jeon, *J. Appl. Phys.*, 2013, **114**, 173511.
